# Supplementary material for: Using explainable machine learning to characterise data drift and detect emergent health risks for emergency department admissions during COVID-19
Source: PubMed Central journal article supplement (PMC8626460; doi:10.1038/s41598-021-02481-y), 2021-11-26
Supplement: 41598_2021_2481_MOESM1_ESM.pdf [file 41598_2021_2481_MOESM1_ESM.pdf]

## Supplementary Material

| Name                                   | Encoding         | Additional notes                                        |
|----------------------------------------|------------------|---------------------------------------------------------|
| 30 day visit count                     | N/A              | ED visits by patient in last 30 days                    |
| Hour of day                            | N/A              |                                                         |
| Weekday                                | N/A              |                                                         |
| Patient age                            | N/A              |                                                         |
| Triage category                        | Target encoding  | Manchester triage system score                          |
| Triage painscore                       | N/A              | Alder Hey triage pain score                             |
| Respiration rate                       | N/A              | Breaths per minute                                      |
| SpO2 scale 1                           | N/A              | Pulse oximetry (oxygen saturation)                      |
| Systolic blood pressure                | N/A              |                                                         |
| Pulse rate                             | N/A              |                                                         |
| Temperature                            | N/A              |                                                         |
| History of smoking                     | One-hot encoding |                                                         |
| Current smoker                         | One-hot encoding |                                                         |
| Hypertension                           | One-hot encoding |                                                         |
| Harmful use of alcohol                 | One-hot encoding |                                                         |
| Depression                             | One-hot encoding |                                                         |
| Type 2 diabetes                        | One-hot encoding |                                                         |
| Asthma                                 | One-hot encoding |                                                         |
| Lives alone                            | One-hot encoding |                                                         |
| COPD                                   | One-hot encoding |                                                         |
| Alcohol screening                      | One-hot encoding |                                                         |
| Harmful use of alcohol with dependence | One-hot encoding |                                                         |
| Osteoarthritis                         | One-hot encoding |                                                         |
| Hypercholesterolaemia                  | One-hot encoding |                                                         |
| Anxiety                                | One-hot encoding |                                                         |
| Atrial fibrillation                    | One-hot encoding |                                                         |
| Anaemia                                | One-hot encoding |                                                         |
| Obesity                                | One-hot encoding |                                                         |
| Chronic kidney disease                 | One-hot encoding |                                                         |
| Hypothyroidism                         | One-hot encoding |                                                         |
| Type 1 diabetes                        | One-hot encoding |                                                         |
| Number of comorbidities                | N/A              | Comorbidities for patient listed on previous ED visits. |
| Arrival mode                           | Target encoding  |                                                         |
| Attendance complaint                   | Target encoding  | Chief complaint taken at attendance                     |
| Triage complaint                       | Target encoding  | Chief complaint taken at triage                         |
| Triage discriminator                   | Target encoding  | Complaint additional notes taken at triage              |

**Table 1.** Full list of features used as input for the admissions model. For each feature, the type of encoding (if applicable) is noted along with any additional explanatory remarks. The one-hot encoded comorbidities are limited to the top 20 most common, however, the number of comorbidities counts all listed in the UHS database.
